# Supplementary material for: Transgenic Adipose-specific Expression of the Nuclear Receptor RORα Drives a Striking Shift in Fat Distribution and Impairs Glycemic Control
Source: PubMed Central journal article supplement — eBioMedicine. 2016 Aug 20;11:101–17. doi: 10.1016/j.ebiom.2016.08.027 (PMC5049998; doi:10.1016/j.ebiom.2016.08.027), 2016-08-20
Supplement: mmc1.pdf [file mmc1.pdf]

Supplementary Figure 1 Generation of Tg-FABP4-ROR $\alpha$ 4 mice.

(A) Western blot analysis of total ROR $\alpha$  protein level in inguinal adipose tissue from WT and *tg/+* Tg-FABP4-ROR $\alpha$ 4 mice. Densitometry scanning was performed for ROR $\alpha$  protein level relative to TATA binding protein (TBP) loading control (n=2 littermate pairs). (B) C2C12 cells were transiently co-transfected with SG5 vector, VP16 vector, SG5-ROR $\alpha$ 4 construct, or VP16-ROR $\alpha$ 4 construct with a mPCP2kluc positive control (Lau et al., 2008) luciferase reporter construct (n=3 technical replicates). Luciferase activity was measured and represented as the mean  $\pm$  S.E.M. fold-activation. Statistical analysis was performed using a one-way ANOVA with Bonferroni's post-test applied where \*P<0.05. (C) Representative images of dissected WT and *tg/+* littermate pair (16 week chow). (D) Mean relative mass/total weight  $\pm$  S.E.M. of adipose tissues (SAT, visceral epididymal, and interscapular brown adipose tissues) dissected from WT and *tg/+* littermate pairs (n=7 littermate pairs, 32 week chow). Statistical analyses were performed using unpaired two-tailed Student's t-tests but no significance was observed.

Supplementary Figure 2 Analysis of homozygous *tg/tg* Tg-FABP4-ROR $\alpha$ 4 mice.

(A) Total ROR $\alpha$  mRNA expression in SAT of WT and *tg/+* (n= 7 littermate pairs) and WT and *tg/tg* (n=3 littermate pairs) was performed using TaqMan assays with 18s rRNA as the endogenous control. (B) Body weight (in grams) of male WT (black) and *tg/tg* (blue, n=5 littermate pairs) mice measured weekly up to 14 weeks of age. (C) Mean relative mass/total weight  $\pm$  S.E.M. of adipose tissues dissected from WT and *tg/tg* (n=3 littermate pairs) mice. Statistical analyses were performed using unpaired two-tailed Student's t-test applied but results were not significant. (D) Fasting blood glucose levels from 6 h-fasted WT (white) and *tg/tg* (black) mice (n=3 littermate pairs) in the chow study. Statistical analysis was performed using unpaired two-tailed Student's t-test where \*\*P<0.01. (E and F) Blood

glucose was measured at various times after intra-peritoneal administration of (E) glucose or (F) insulin (t=0) on 6 h-fasted WT (black) and *tg/tg* (blue) littermates in the chow study. Statistical analysis was performed using two-way ANOVAs with Bonferroni's post test applied where \*\*P<0.01; \*\*\*P<0.001 for *tg/tg* versus WT (n=3 littermate pairs).

### Supplementary Figure 3

(A) H&E staining of HFD livers. Formalin-fixed and paraffinized livers from HFD-fed WT and *tg/+* mice were sectioned at 0.7  $\mu$ m-step intervals and stained for morphology using H&E. Representative images acquired from n=4 littermate pairs are shown. (B) Top 25 significantly enriched biological processes identified in DAVID analysis of HFD liver. P-value was set at <0.05.

Supplementary Figure 4 qPCR analysis of genes involved in thermogenesis program in brown adipose tissue.

Relative gene expression of the thermogenic transcriptional regulators, *Ehmt1*, *Tle3*, and *Prdm16*, in brown adipose tissue from (A) chow and (C) HFD fed 32-week *tg/+* Tg-FABP4-ROR $\alpha$ 4 and WT mice (n=5 littermate pairs). Quantitative PCR was performed on RNA fractionated from interscapular brown adipose tissue, and measured *Ehmt1*, *Tle3*, and *Prdm16* expression (using TaqMan assays), and presented as relative gene expression normalized against *Gusb*. Relative gene expression of *Acot11*, *Dio2*, *Erra*, *Mcpt1* and *Ppara* in brown adipose tissue from (B) chow and (D) HFD fed 32-week *tg/+* Tg-FABP4-ROR $\alpha$ 4 and WT littermates (n=5). Quantitative PCR was performed on RNA fractionated from interscapular brown adipose tissue (using SYBR assays), and expression presented as relative gene expression normalized against *Rplp0*. Statistical analysis was performed using unpaired two-tailed Student's t-test where \*P<0.05; \*\*P<0.01; \*\*\*P<0.001.

# Supplementary Fig 1

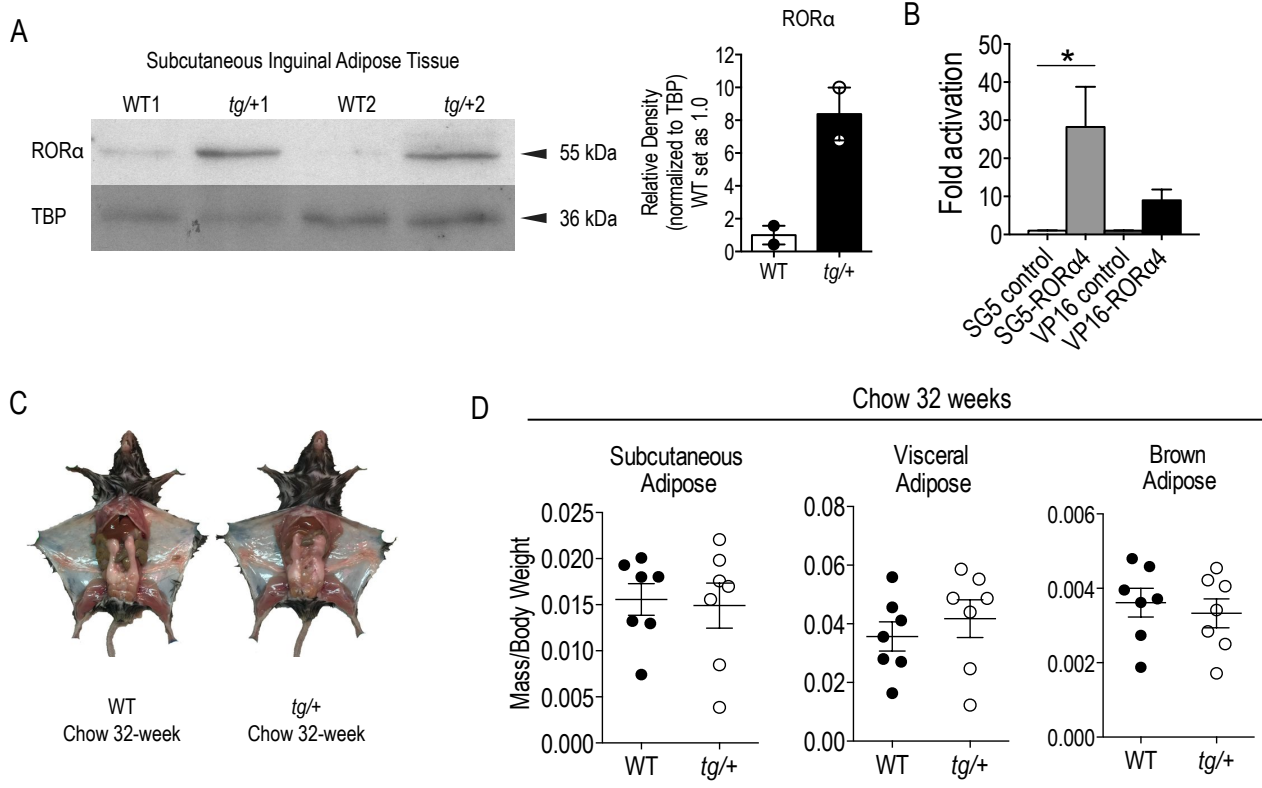

# Supplementary Fig 2

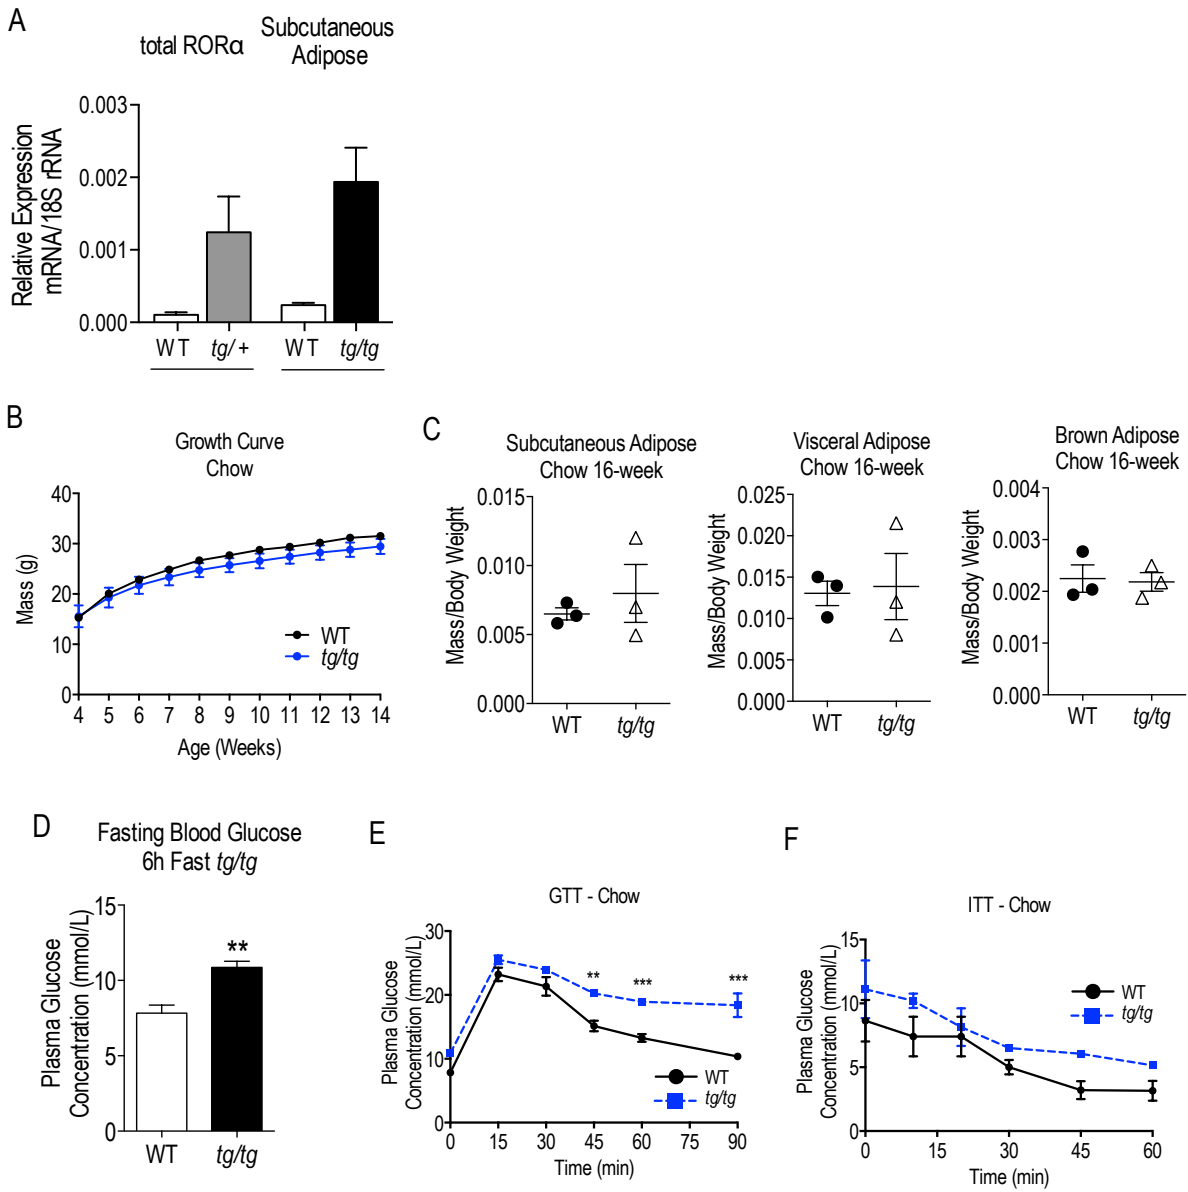

# Supplementary Fig 3

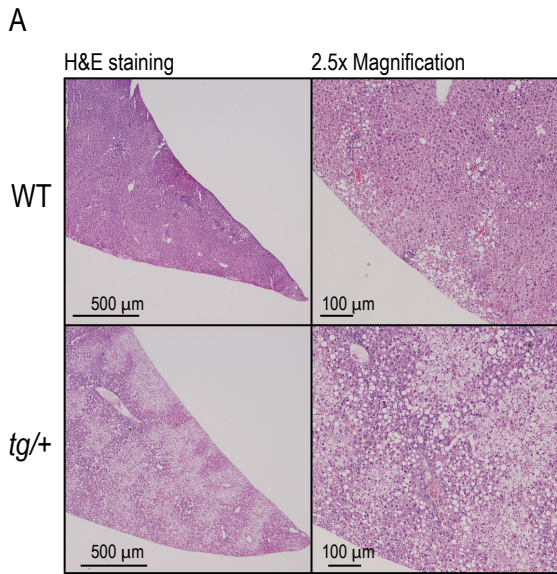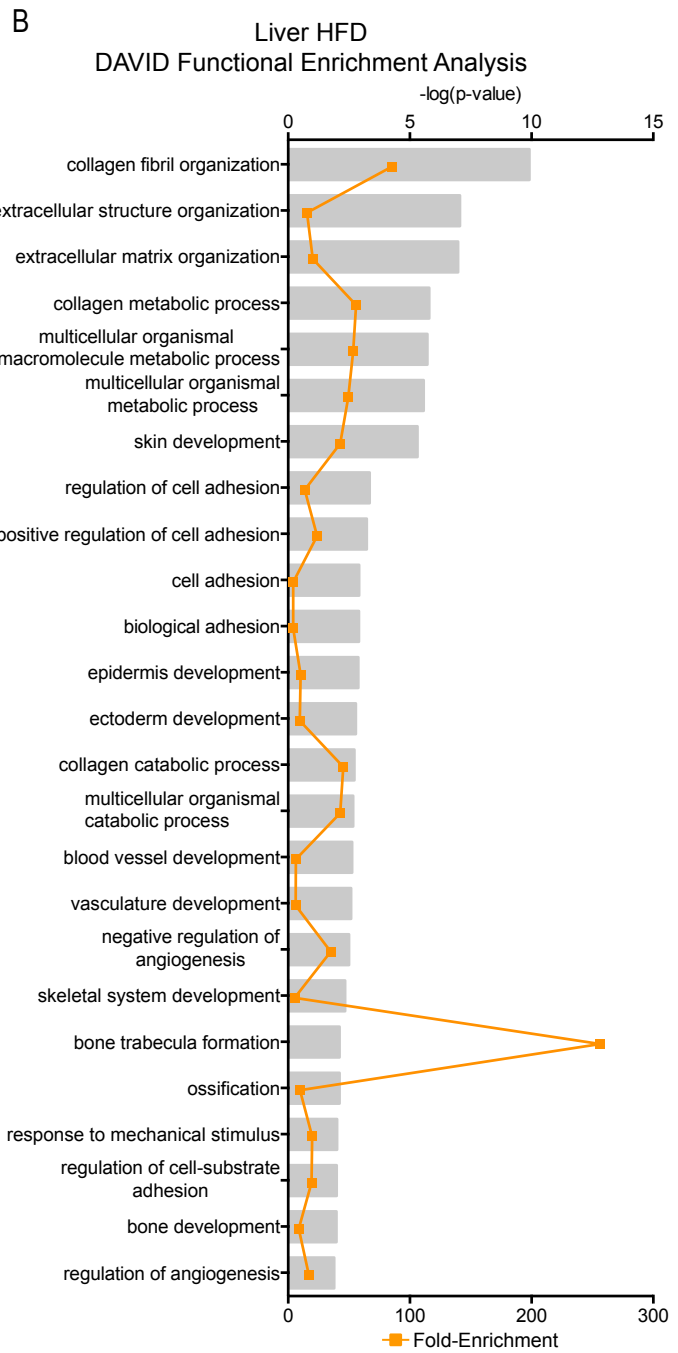

# Supplementary Fig 4

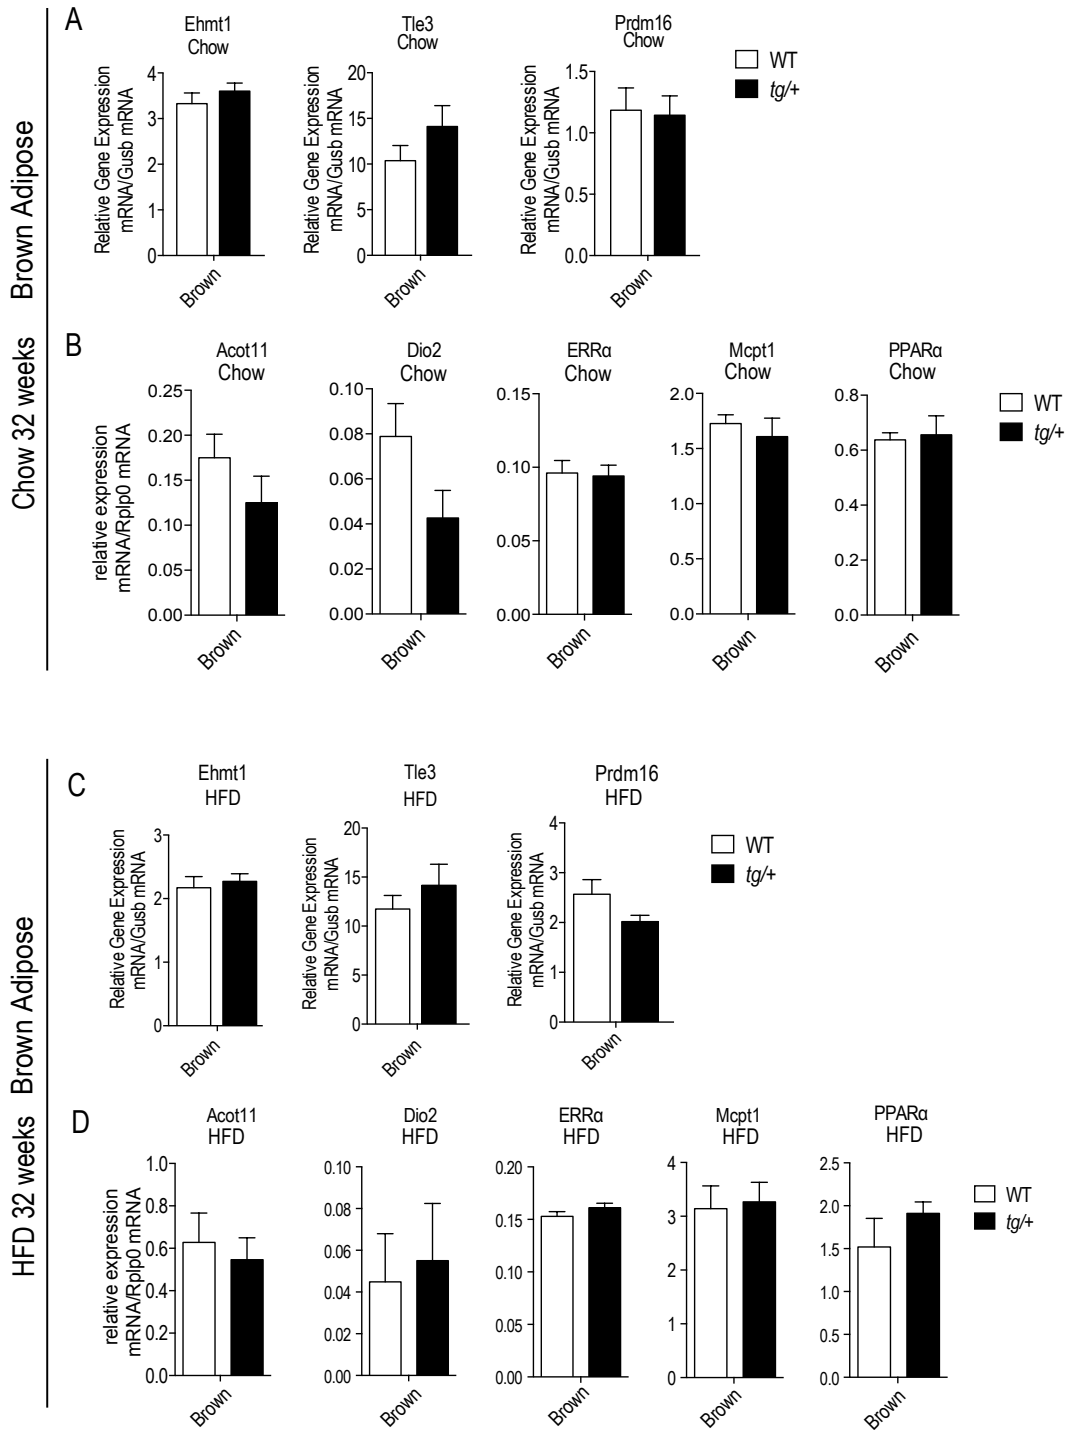

## Supplemental Table 1

**Top 50 up-regulated genes** RNA-seq profiling in subcutaneous inguinal adipose tissue (HFD).

| Regulation | Gene          | Log <sub>2</sub> Fold-change | P Value         | Corrected P Value |
|------------|---------------|------------------------------|-----------------|-------------------|
| Up         | Liph          | 5.5426                       | 1.64E-27        | 9.55E-25          |
| Up         | Serpinb1a     | 5.5275                       | 3.78E-206       | 1.91E-202         |
| Up         | Muc13         | 5.4333                       | 2.77E-74        | 8.41E-71          |
| Up         | Dsc3          | 5.1485                       | 4.14E-15        | 6.48E-13          |
| Up         | Egfl4         | 4.8117                       | 5.94E-30        | 4.50E-27          |
| Up         | Wdr52         | 4.7363                       | 8.51E-14        | 1.16E-11          |
| Up         | Dsg2          | 4.4730                       | 3.31E-17        | 6.97E-15          |
| Up         | Pla2g5        | 4.3257                       | 7.59E-59        | 1.65E-55          |
| Up         | Serpinb9      | 4.3041                       | 3.13E-282       | 2.37E-278         |
| Up         | Pkp3          | 4.2785                       | 4.93E-28        | 2.99E-25          |
| Up         | Tmem102       | 4.1994                       | 2.99E-10        | 2.15E-08          |
| Up         | Aldh3a1       | 4.0965                       | 6.67E-12        | 6.89E-10          |
| Up         | Hebp2         | 4.0734                       | 7.03E-51        | 1.19E-47          |
| Up         | Syt15         | 4.0024                       | 9.30E-12        | 9.23E-10          |
| Up         | Sult2b1       | 3.9897                       | 1.78E-26        | 9.32E-24          |
| Up         | Ndst3         | 3.9373                       | 2.00E-18        | 5.22E-16          |
| Up         | Dock3         | 3.8142                       | 2.00E-11        | 1.82E-09          |
| Up         | Oprk1         | 3.8065                       | 2.79E-10        | 2.02E-08          |
| Up         | Serpinb1b     | 3.7357                       | 5.38E-10        | 3.63E-08          |
| Up         | Ly6d          | 3.6874                       | 4.81E-18        | 1.20E-15          |
| Up         | Hpcal4        | 3.6575                       | 1.97E-11        | 1.81E-09          |
| Up         | Tnnt1         | 3.6133                       | 2.82E-20        | 9.29E-18          |
| Up         | Serpina1e     | 3.6130                       | 1.11E-10        | 8.68E-09          |
| Up         | Mgarp         | 3.5284                       | 6.69E-10        | 4.37E-08          |
| Up         | Serpinb1c     | 3.5276                       | 2.75E-07        | 1.04E-05          |
| Up         | Lad1          | 3.4636                       | 1.61E-09        | 9.73E-08          |
| Up         | Cdcp1         | 3.4304                       | 9.96E-08        | 4.20E-06          |
| Up         | Brinp2        | 3.4003                       | 2.38E-08        | 1.17E-06          |
| Up         | Extl1         | 3.3997                       | 4.10E-10        | 2.91E-08          |
| Up         | Ugt8a         | 3.3792                       | 8.08E-10        | 5.18E-08          |
| <b>Up</b>  | <b>Rora</b>   | <b>3.3398</b>                | <b>1.60E-92</b> | <b>6.08E-89</b>   |
| Up         | Zfp92         | 3.3110                       | 8.93E-10        | 5.69E-08          |
| Up         | Tmem56        | 3.2757                       | 8.87E-08        | 3.78E-06          |
| Up         | Ap1m2         | 3.2592                       | 3.01E-06        | 8.34E-05          |
| Up         | 2900052N01Rik | 3.1674                       | 1.29E-07        | 5.24E-06          |
| Up         | Adamdec1      | 3.1222                       | 1.67E-06        | 5.05E-05          |
| Up         | Nt5c1a        | 3.0410                       | 1.18E-10        | 9.15E-09          |
| Up         | Gm6484        | 3.0166                       | 1.10E-10        | 8.61E-09          |
| Up         | Plekhb1       | 2.9907                       | 1.47E-24        | 6.98E-22          |
| Up         | Dapl1         | 2.9809                       | 6.39E-11        | 5.22E-09          |

|    |               |        |          |          |
|----|---------------|--------|----------|----------|
| Up | Plch2         | 2.9570 | 1.79E-06 | 5.33E-05 |
| Up | Grem1         | 2.9094 | 5.61E-05 | 1.02E-03 |
| Up | 1810041L15Rik | 2.8964 | 2.81E-05 | 5.73E-04 |
| Up | Cbs           | 2.8862 | 5.73E-23 | 2.48E-20 |
| Up | Fam150b       | 2.8663 | 3.81E-17 | 7.51E-15 |
| Up | Bspry         | 2.8482 | 2.68E-05 | 5.49E-04 |
| Up | Colq          | 2.8387 | 3.81E-05 | 7.47E-04 |
| Up | Akr1c14       | 2.8386 | 1.18E-22 | 4.99E-20 |
| Up | Eps8l2        | 2.7981 | 9.00E-19 | 2.44E-16 |
| Up | Gm9696        | 2.7917 | 8.74E-11 | 7.01E-09 |



**Top 50 down-regulated genes** RNA-seq profiling in inguinal adipose tissue (HFD).

| Regulation  | Gene          | Log <sub>2</sub> Fold-change | P Value         | Corrected P Value |
|-------------|---------------|------------------------------|-----------------|-------------------|
| Down        | Peg10         | -3.4101                      | 1.46E-13        | 1.98E-11          |
| Down        | Muc11         | -3.3138                      | 2.63E-06        | 7.43E-05          |
| Down        | Gabbr2        | -3.2133                      | 2.48E-39        | 3.13E-36          |
| Down        | Zim1          | -3.1328                      | 2.34E-19        | 6.97E-17          |
| Down        | Acta1         | -3.0988                      | 1.20E-11        | 1.18E-09          |
| Down        | Peg3os        | -2.6731                      | 2.18E-04        | 3.09E-03          |
| Down        | Slc13a3       | -2.6298                      | 5.41E-11        | 4.49E-09          |
| Down        | Thbs1         | -2.5967                      | 3.23E-30        | 2.58E-27          |
| Down        | Aldh1a2       | -2.5509                      | 9.83E-11        | 7.81E-09          |
| Down        | Acta2         | -2.5034                      | 1.00E-33        | 1.09E-30          |
| Down        | Ttc36         | -2.4985                      | 4.40E-08        | 2.04E-06          |
| Down        | Bpifb6        | -2.4156                      | 3.85E-08        | 1.83E-06          |
| Down        | Peg3          | -2.3643                      | 6.69E-27        | 3.62E-24          |
| <b>Down</b> | <b>Sfrp5</b>  | <b>-2.3506</b>               | <b>3.38E-59</b> | <b>8.55E-56</b>   |
| Down        | Optc          | -2.3107                      | 2.04E-07        | 7.94E-06          |
| Down        | Alb           | -2.3085                      | 1.70E-04        | 2.52E-03          |
| Down        | Ear2          | -2.3065                      | 1.50E-04        | 2.28E-03          |
| Down        | 4933417O13Rik | -2.2999                      | 4.81E-04        | 5.82E-03          |
| Down        | Tmem178       | -2.2589                      | 4.88E-07        | 1.74E-05          |
| Down        | Slc22a2       | -2.2267                      | 3.07E-11        | 2.69E-09          |
| Down        | Stac          | -2.1650                      | 1.89E-09        | 1.13E-07          |
| Down        | Pkhd1         | -2.1609                      | 4.81E-04        | 5.82E-03          |
| Down        | 4932435O22Rik | -2.1187                      | 9.54E-05        | 1.58E-03          |
| Down        | 2810459M11Rik | -2.0778                      | 1.33E-03        | 1.28E-02          |
| Down        | Timp4         | -2.0464                      | 6.04E-12        | 6.32E-10          |
| Down        | Nexn          | -2.0428                      | 4.31E-20        | 1.39E-17          |
| Down        | Map3k7cl      | -2.0350                      | 4.16E-07        | 1.52E-05          |
| Down        | Gfilb         | -2.0111                      | 1.94E-03        | 1.72E-02          |
| Down        | Clrn1         | -1.9958                      | 4.11E-06        | 1.08E-04          |
| Down        | Fgf21         | -1.9940                      | 4.28E-05        | 8.16E-04          |
| Down        | Abcc2         | -1.9674                      | 1.14E-03        | 1.15E-02          |
| Down        | Slc9b2        | -1.9430                      | 1.76E-06        | 5.29E-05          |
| Down        | Trpc3         | -1.9368                      | 1.96E-11        | 1.81E-09          |
| Down        | Abat          | -1.9278                      | 4.40E-23        | 1.96E-20          |
| Down        | P2rx5         | -1.9239                      | 2.89E-17        | 6.27E-15          |
| Down        | Kent1         | -1.9140                      | 6.76E-04        | 7.65E-03          |
| Down        | Syt14         | -1.8809                      | 1.89E-05        | 4.12E-04          |
| Down        | Fcamr         | -1.8803                      | 3.79E-10        | 2.71E-08          |
| Down        | Calr4         | -1.8582                      | 1.92E-07        | 7.51E-06          |
| Down        | Mogat2        | -1.8540                      | 3.95E-06        | 1.04E-04          |
| Down        | Ccr2          | -1.8453                      | 1.21E-21        | 4.60E-19          |
| Down        | Slc9a4        | -1.8151                      | 1.57E-05        | 3.53E-04          |
| Down        | Ankrd23       | -1.8129                      | 3.00E-11        | 2.65E-09          |

|      |         |         |          |          |
|------|---------|---------|----------|----------|
| Down | Hspb7   | -1.8031 | 2.06E-06 | 6.03E-05 |
| Down | Pmfbp1  | -1.7930 | 9.17E-04 | 9.57E-03 |
| Down | Gls2    | -1.7911 | 2.58E-03 | 2.13E-02 |
| Down | Prkag3  | -1.7644 | 2.23E-06 | 6.45E-05 |
| Down | Fam47e  | -1.7467 | 1.98E-03 | 1.74E-02 |
| Down | Fam83d  | -1.7467 | 3.45E-04 | 4.45E-03 |
| Down | Gadd45b | -1.7454 | 4.89E-10 | 3.36E-08 |

**Up-regulated genes** RNA-seq profiling in liver (HFD).

| Regulation | Gene     | Log <sub>2</sub> Fold-change | P Value  | Corrected P Value |
|------------|----------|------------------------------|----------|-------------------|
| Up         | Cx3cr1   | 2.6468                       | 6.69E-20 | 8.78E-16          |
| Up         | Col1a1   | 2.4141                       | 1.47E-13 | 4.82E-10          |
| Up         | Ephb2    | 1.9752                       | 3.05E-10 | 5.01E-07          |
| Up         | Serpib6b | 1.9191                       | 9.38E-14 | 4.10E-10          |
| Up         | Gpr98    | 1.8520                       | 1.02E-10 | 1.91E-07          |
| Up         | Col3a1   | 1.8205                       | 1.45E-12 | 3.80E-09          |
| Up         | Col1a2   | 1.7669                       | 1.23E-15 | 8.09E-12          |
| Up         | Mmp13    | 1.7544                       | 4.49E-05 | 1.53E-02          |
| Up         | Chil3    | 1.6898                       | 1.76E-05 | 7.69E-03          |
| Up         | Mgl2     | 1.5795                       | 2.65E-04 | 4.76E-02          |
| Up         | Ubd      | 1.5703                       | 5.41E-05 | 1.73E-02          |
| Up         | Sdcbp2   | 1.5677                       | 1.70E-04 | 3.59E-02          |
| Up         | Aqp7     | 1.5219                       | 1.87E-04 | 3.83E-02          |
| Up         | Lrrc39   | 1.4752                       | 1.13E-05 | 5.51E-03          |
| Up         | Cd63     | 1.4121                       | 1.13E-04 | 2.97E-02          |
| Up         | Itgax    | 1.4089                       | 2.88E-05 | 1.11E-02          |
| Up         | Ccdc120  | 1.4027                       | 1.56E-04 | 3.54E-02          |
| Up         | Serpib9  | 1.3954                       | 8.90E-11 | 1.91E-07          |
| Up         | Sema4d   | 1.3574                       | 8.51E-05 | 2.38E-02          |
| Up         | Col5a2   | 1.3563                       | 4.79E-05 | 1.57E-02          |
| Up         | S100a9   | 1.2746                       | 4.55E-05 | 1.53E-02          |
| Up         | Tnc      | 1.2352                       | 4.11E-05 | 1.46E-02          |
| Up         | Thbs1    | 1.2269                       | 7.73E-07 | 7.80E-04          |
| Up         | Adamts12 | 1.2252                       | 2.32E-04 | 4.28E-02          |
| Up         | Col6a3   | 1.2194                       | 1.06E-06 | 9.30E-04          |
| Up         | Haus8    | 1.1894                       | 1.01E-06 | 9.30E-04          |
| Up         | Lox11    | 1.1689                       | 1.63E-04 | 3.56E-02          |
| Up         | Col6a2   | 1.1649                       | 7.38E-06 | 4.21E-03          |
| Up         | Mmp2     | 1.1616                       | 2.46E-05 | 1.01E-02          |
| Up         | Adamts9  | 1.1514                       | 1.75E-04 | 3.64E-02          |
| Up         | Serpina7 | 1.1460                       | 5.66E-07 | 6.19E-04          |
| Up         | Tubb2a   | 1.1238                       | 2.93E-06 | 2.19E-03          |
| Up         | Kctd17   | 1.1236                       | 6.04E-05 | 1.89E-02          |
| Up         | Uap111   | 1.1211                       | 1.22E-04 | 3.07E-02          |
| Up         | Cntnap1  | 1.1138                       | 3.13E-05 | 1.14E-02          |
| Up         | Adamts2  | 1.0852                       | 2.71E-05 | 1.08E-02          |
| Up         | Anxa2    | 1.0593                       | 2.30E-07 | 2.74E-04          |
| Up         | Tnxb     | 1.0582                       | 5.94E-06 | 3.71E-03          |
| Up         | Fbn1     | 1.0017                       | 3.00E-05 | 1.12E-02          |
| Up         | Ngfr     | 0.9833                       | 2.73E-04 | 4.85E-02          |
| Up         | Olfml3   | 0.9581                       | 7.33E-05 | 2.19E-02          |
| Up         | Trim47   | 0.9498                       | 1.25E-04 | 3.08E-02          |
| Up         | Col5a1   | 0.9374                       | 3.34E-06 | 2.19E-03          |
| Up         | Col4a2   | 0.9301                       | 1.59E-09 | 2.32E-06          |
| Up         | Matn2    | 0.9203                       | 9.64E-05 | 2.63E-02          |
| Up         | Jun      | 0.9025                       | 1.65E-04 | 3.56E-02          |
| Up         | Pdgfrb   | 0.8927                       | 3.07E-06 | 2.19E-03          |
| Up         | Plk3     | 0.8786                       | 1.56E-05 | 7.31E-03          |
| Up         | Ltbp1    | 0.8729                       | 6.99E-05 | 2.13E-02          |
| Up         | Apoa4    | 0.8573                       | 1.18E-04 | 3.05E-02          |
| Up         | Anxa5    | 0.8401                       | 1.55E-04 | 3.54E-02          |
| Up         | Sparc    | 0.8364                       | 7.30E-06 | 4.21E-03          |
| Up         | Fstl1    | 0.8351                       | 1.92E-04 | 3.83E-02          |

|    |          |        |          |          |
|----|----------|--------|----------|----------|
| Up | Lcn2     | 0.8334 | 1.41E-04 | 3.43E-02 |
| Up | Col4a1   | 0.8293 | 7.73E-08 | 1.01E-04 |
| Up | Ccdc80   | 0.8213 | 1.05E-05 | 5.29E-03 |
| Up | Pdk4     | 0.7954 | 1.93E-04 | 3.83E-02 |
| Up | Serpinh1 | 0.7854 | 2.17E-05 | 9.19E-03 |
| Up | Phldb1   | 0.7621 | 2.24E-04 | 4.24E-02 |
| Up | Tmem43   | 0.6858 | 2.80E-04 | 4.90E-02 |
| Up | Col14a1  | 0.6458 | 1.97E-04 | 3.85E-02 |
| Up | Tgm2     | 0.5549 | 2.39E-04 | 4.35E-02 |
| Up | Myo9b    | 0.5457 | 7.88E-05 | 2.30E-02 |

**Down-regulated genes** from RNA-seq profiling in liver (HFD).

| <b>Regulation</b> | <b>Gene</b> | <b>Log<sub>2</sub>Fold-change</b> | <b>P Value</b> | <b>Corrected P Value</b> |
|-------------------|-------------|-----------------------------------|----------------|--------------------------|
| Down              | Cyp2c40     | -1.9598                           | 3.31E-06       | 2.19E-03                 |
| Down              | Cyp17a1     | -1.1833                           | 1.45E-06       | 1.19E-03                 |
| Down              | Tsc22d3     | -1.0823                           | 1.74E-05       | 7.69E-03                 |
| Down              | Cyp2c37     | -0.9858                           | 2.26E-04       | 4.24E-02                 |
| Down              | BC089597    | -0.9473                           | 1.57E-04       | 3.54E-02                 |
| Down              | Ces2a       | -0.7478                           | 1.01E-05       | 5.29E-03                 |
| Down              | Fena        | -0.6940                           | 1.62E-04       | 3.56E-02                 |
| Down              | Hsd11b1     | -0.6391                           | 1.04E-05       | 5.29E-03                 |
| Down              | Pxmp2       | -0.5372                           | 8.47E-05       | 2.38E-02                 |
| Down              | Afm         | -0.5204                           | 1.56E-04       | 3.54E-02                 |
| Down              | BC024386    | -0.5153                           | 1.11E-04       | 2.96E-02                 |
| Down              | Il1rap      | -0.4679                           | 2.16E-04       | 4.17E-02                 |
